# Supplementary material for: Childhood chronic conditions and health-related quality of life: Findings from a large population-based study
Source: PubMed Central journal article supplement (PMC5456082; doi:10.1371/journal.pone.0178539), 2017-06-02
Supplement: pone.0178539.s001.pdf [file pone.0178539.s001.pdf]

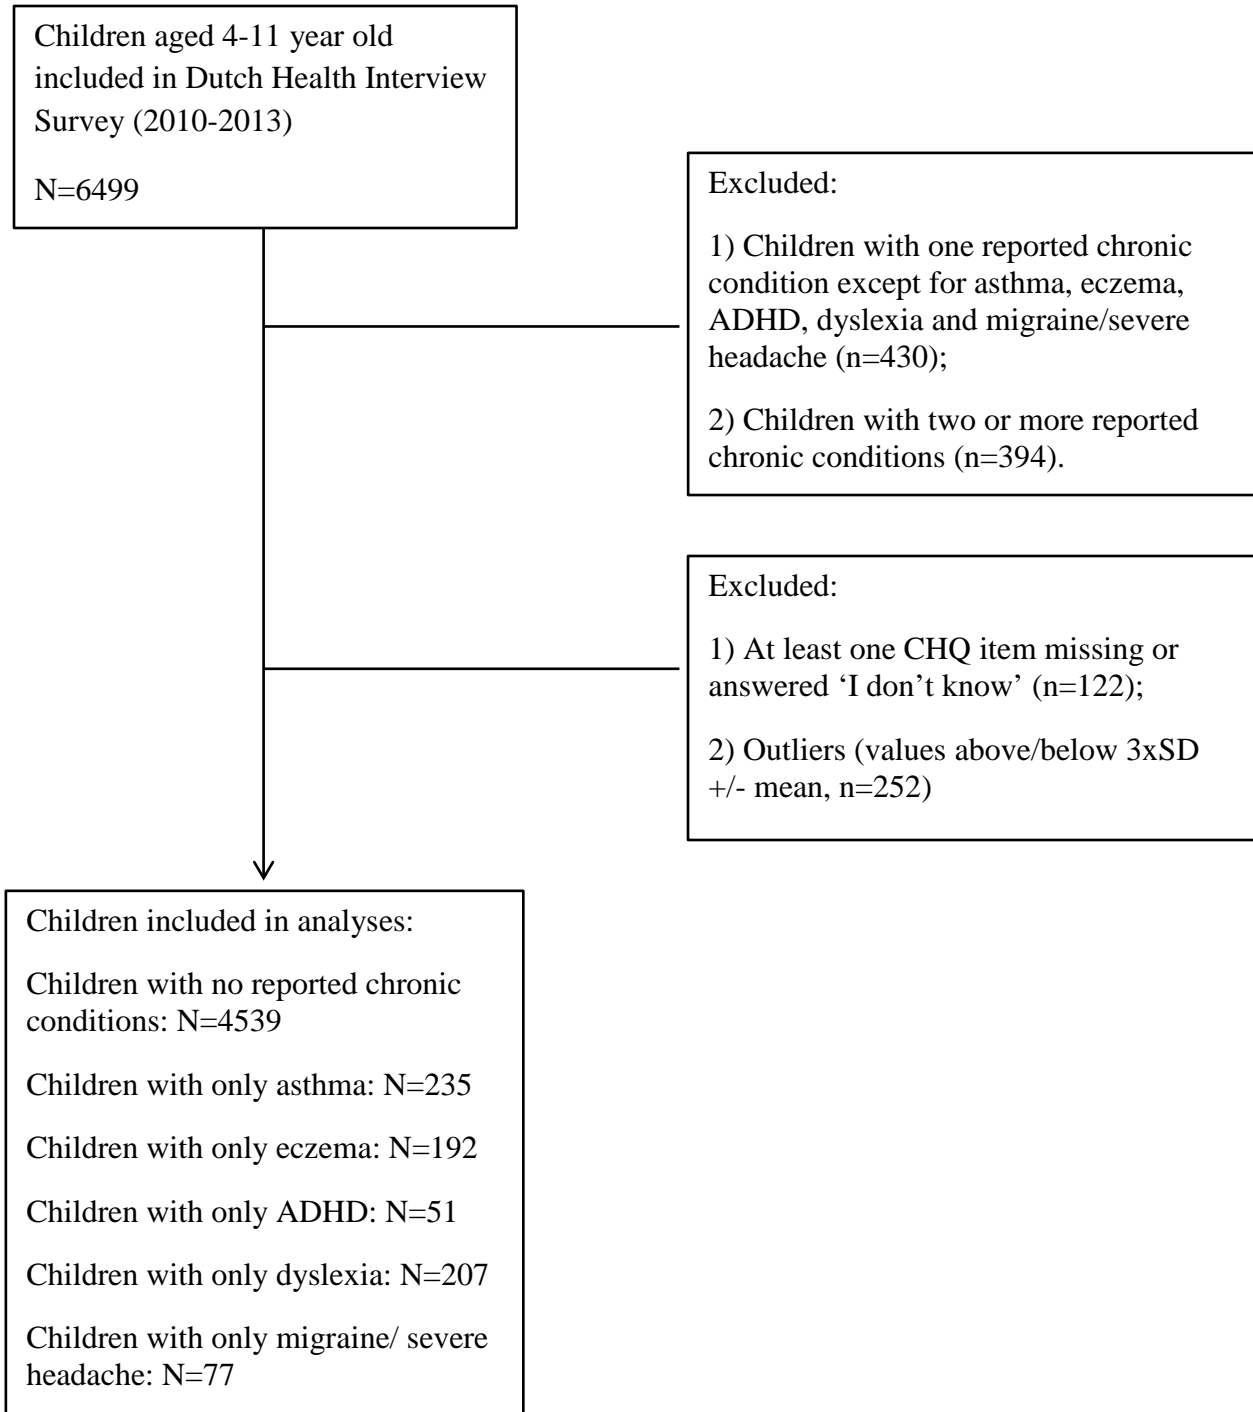

Figure S1. Flow chart of the population for analysis (N=5301)
