# Supplementary material for: Childhood chronic conditions and health-related quality of life: Findings from a large population-based study
Source: PubMed Central journal article supplement (PMC5456082; doi:10.1371/journal.pone.0178539), 2017-06-02
Supplement: pone.0178539.s002.pdf [file pone.0178539.s002.pdf]

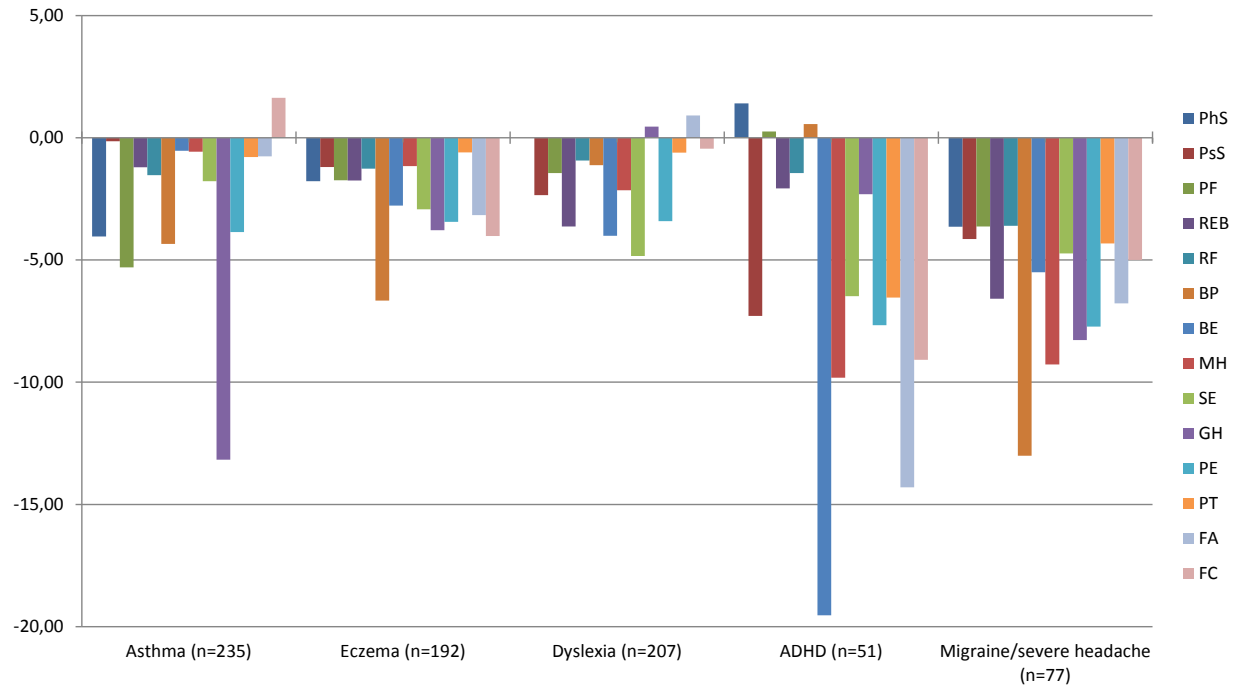

**Figure S2. Differences in the mean scores on the CHQ-PF28 scales between subgroups of children with a condition (asthma, eczema, ADHD, dyslexia, migraine/severe headache) and children with no reported chronic conditions (N=5301)**

PhS Physical Summary Component Scale; PsS Psychosocial Summary Component Scale; PF physical functioning; REB role functioning-emotional/behavior; RF role functioning-physical; BP bodily pain; BE general behavior; MH mental health; SE self-esteem; GH general health perceptions; PE parental impact: emotional; PT parental impact-time; FA family activities; FC family cohesion; CH change in health
